# Supplementary material for: CCD-Rice: A long-term paddy rice distribution dataset in China at 30 m resolution
Source: Copernicus journal article supplement (doi:10.5194/essd-2024-584), 2024-12-18
Supplement: Supplementary file 1 [file essd-2024-584-supplement.pdf]

## Supplement of

# CCD-Rice: A long-term paddy rice distribution dataset in China at 30 m resolution

Ruoque Shen <sup>1</sup>, Qiongyan Peng <sup>1</sup>, Xiangqian Li <sup>1</sup>, Xiuzhi Chen <sup>1</sup>, and Wenping Yuan <sup>2</sup>

<sup>1</sup>School of Atmospheric Sciences, Sun Yat-sen University, Zhuhai 519082, Guangdong, China

<sup>2</sup>Institute of Carbon Neutrality, Sino-French Institute for Earth System Science. College of Urban and Environmental Sciences, Peking University, Beijing 100871.China

Correspondence to: Wenping Yuan (yuanwp@pku.edu.cn)

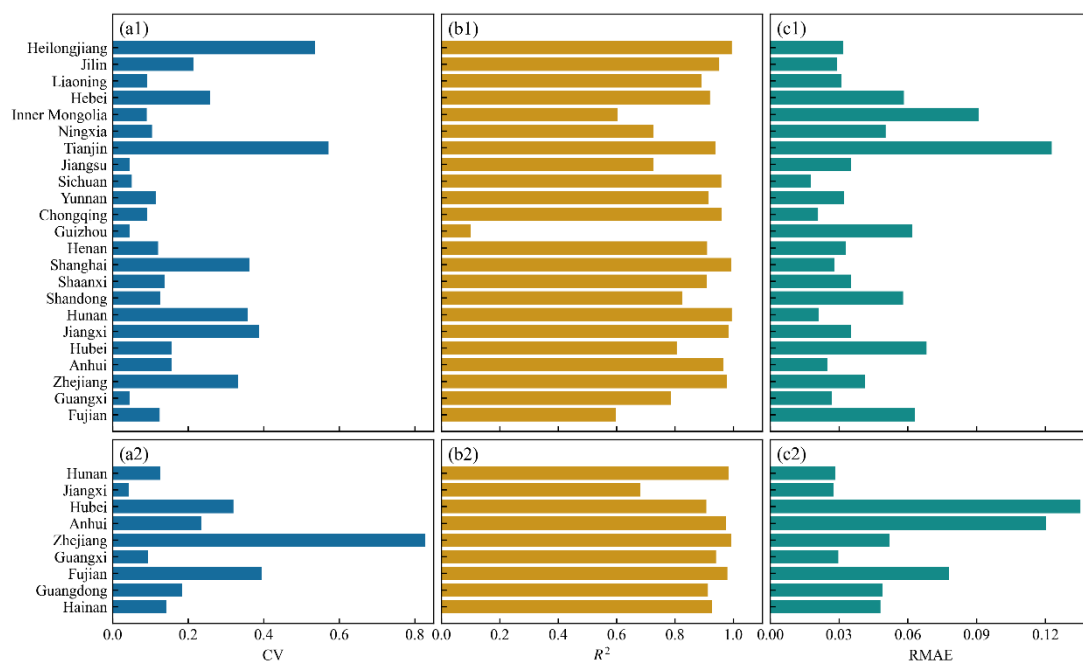

**Figure S1: Comparison of statistical and identified area at province level. Panels (a1) and (a2) show the coefficients of variation (CV) of the statistical area of single- and double-season rice in each province, respectively. Panels (b1) and (b2) show R<sup>2</sup> values between statistical and identified area of single- and double-season rice in each province, respectively. Panels (c1) and (c2) show RMAE between statistical and identified area of single- and double-season rice in each province, respectively.**
